# Supplementary material
Source: publisher site journal article supplement (https://www.dovepress.com/article/493911)
Supplement: Supplementary file 1 [file get_supplementary_file.php]

**Table S1.** Back-calculated concentrations of calibration standards.

| Esomeprazole  (Conc. ng/mL) | 0.20 | 0.50 | 2.00 | 10.0 | 20.0 | 50.0 | 100 | 200 |
| --- | --- | --- | --- | --- | --- | --- | --- | --- |
| Mean | 0.20 | 0.49 | 2.02 | 9.83 | 20.10 | 50.82 | 98.57 | 203.13 |
| SD | 0.01682 | 0.02344 | 0.1056 | 0.2672 | 0.9324 | 1.7962 | 3.6195 | 7.9971 |
| RSD% | 8.3 | 4.8 | 5.2 | 2.7 | 4.6 | 3.5 | 3.7 | 3.9 |
| RE% | 0.9 | -2.1 | 0.7 | -1.7 | 0.5 | 1.6 | -1.4 | 1.6 |
| n | 16 | 15 | 16 | 15 | 16 | 16 | 16 | 16 |
| Rabeprazole  (Conc. ng/mL) | 0.20 | 0.50 | 2.00 | 10.0 | 20.0 | 50.0 | 100 | 200 |
| Mean | 0.20 | 0.51 | 1.98 | 10.12 | 19.95 | 48.70 | 102.46 | 201.59 |
| SD | 0.01482 | 0.03250 | 0.1017 | 0.4772 | 0.9792 | 2.3968 | 5.0335 | 12.1637 |
| RSD% | 7.4 | 6.4 | 5.1 | 4.7 | 4.9 | 4.9 | 4.9 | 6.0 |
| RE% | -0.3 | 1.6 | -0.9 | 1.2 | -0.2 | -2.6 | 2.5 | 0.8 |
| n | 16 | 16 | 16 | 14 | 16 | 16 | 16 | 16 |
| Ilaprazole  (Conc. ng/mL) | 0.20 | 0.50 | 2.00 | 10.0 | 20.0 | 50.0 | 100 | 200 |
| Mean | 0.20 | 0.50 | 1.94 | 10.14 | 20.25 | 50.67 | 99.76 | 201.83 |
| SD | 0.01834 | 0.04190 | 0.1107 | 0.8087 | 1.3746 | 3.0771 | 6.0913 | 10.3382 |
| RSD% | 9.1 | 8.5 | 5.7 | 8.0 | 6.8 | 6.1 | 6.1 | 5.1 |
| RE% | 0.7 | -0.9 | -3.1 | 1.4 | 1.3 | 1.3 | -0.2 | 0.9 |
| n | 14 | 15 | 16 | 14 | 15 | 16 | 14 | 16 |
| Lansoprazole  (Conc. ng/mL) | 0.20 | 0.50 | 2.00 | 10.0 | 20.0 | 50.0 | 100 | 200 |
| Mean | 0.20 | 0.51 | 1.96 | 10.38 | 19.90 | 50.17 | 100.19 | 193.87 |
| SD | 0.01862 | 0.03035 | 0.1008 | 0.6815 | 1.3499 | 2.8650 | 7.4370 | 9.0355 |
| RSD% | 9.3 | 5.9 | 5.1 | 6.6 | 6.8 | 5.7 | 7.4 | 4.7 |
| RE% | 0.0 | 2.1 | -1.8 | 3.8 | -0.5 | 0.3 | 0.2 | -3.1 |
| n | 16 | 15 | 16 | 15 | 16 | 16 | 16 | 16 |
| Pantoprazole  (Conc. ng/mL) | 0.20 | 0.50 | 2.00 | 10.0 | 20.0 | 50.0 | 100 | 200 |
| Mean | 0.20 | 0.50 | 1.96 | 10.09 | 19.71 | 50.15 | 101.06 | 201.82 |
| SD | 0.01414 | 0.02373 | 0.09338 | 0.3689 | 1.1134 | 1.7352 | 5.0524 | 7.8231 |
| RSD% | 7.1 | 4.7 | 4.8 | 3.7 | 5.6 | 3.5 | 5.0 | 3.9 |
| RE% | 0.0 | 0.4 | -2.2 | 0.9 | -1.5 | 0.3 | 1.1 | 0.9 |
| n | 16 | 16 | 16 | 15 | 16 | 16 | 16 | 16 |
| Vonoprazan  (Conc. ng/mL) | 0.50 | 1.25 | 5.00 | 25.0 | 50.0 | 125 | 250 | 500 |
| Mean | 0.51 | 1.20 | 4.69 | 25.19 | 50.22 | 130.92 | 258.12 | 493.07 |
| SD | 0.02166 | 0.08832 | 0.2700 | 1.0743 | 3.2151 | 5.1433 | 10.5806 | 18.4273 |
| RSD% | 4.2 | 7.3 | 5.8 | 4.3 | 6.4 | 3.9 | 4.1 | 3.7 |
| RE% | 2.5 | -3.7 | -6.1 | 0.8 | 0.4 | 4.7 | 3.2 | -1.4 |
| n | 13 | 16 | 16 | 15 | 16 | 16 | 16 | 16 |

SD: Standard Deviation; RSD%: Relative standard deviation; RE%: Relative Error; n: the number of concentrations participating in standard curve fitting.

**Table S2.** Matrix Effect in hemolytic plasma and hyperlipidemic plasma.

| **Item** | Hyperlipidemic matrix (300mg/dL) | | Hemolyzed matrix  (2%) | |
| --- | --- | --- | --- | --- |
| **Esomeprazole** | LQC | HQC | LQC | HQC |
| Nominal Conc. | 0.40 | 160 | 0.40 | 160 |
| MF mean | 106.3 | 102.0 | 101.7 | 102.2 |
| **Rabeprazole** | LQC | HQC | LQC | HQC |
| Nominal Conc. | 0.40 | 160 | 0.40 | 160 |
| MF mean | 99.3 | 98.8 | 98.7 | 99.8 |
| **Ilaprazole** | LQC | HQC | LQC | HQC |
| Nominal Conc. | 0.40 | 160 | 0.40 | 160 |
| MF mean | 92.2 | 99.4 | 93.6 | 116.6 |
| **Lansoprazole** | LQC | HQC | LQC | HQC |
| Nominal Conc. | 0.40 | 160 | 0.40 | 160 |
| MF mean | 107.7 | 94.7 | 98.8 | 98.0 |
| **Pantoprazole** | LQC | HQC | LQC | HQC |
| Nominal Conc. | 0.40 | 160 | 0.20 | 160 |
| MF mean | 110.4 | 100.1 | 114.2 | 99.1 |
| **Vonoprazan** | LQC | HQC | LQC | HQC |
| Nominal Conc. | 1.00 | 400 | 1.00 | 400 |
| MF mean | 118.5 | 101.6 | 91.1 | 101.3 |

LQC: Low-quality control; MQC: Middle-quality control; HQC: High-quality control; SD: Standard Deviation; RSD%: Relative standard deviation; RE%: Relative Error.

**Table S3.** Stability of analytes in blood samples

| Analytes | 0h  Conc. ± SD  (ng/mL, n=3) | 2 h  Conc. ± SD  (ng/mL, n=3) | %Recovery |
| --- | --- | --- | --- |
| **Esomeprazole** | 0.57±0.03512 | 0.62±0.03786 | 108.8 |
| 62.05±2.3304 | 60.10±3.3059 | 96.9 |
| **Rabeprazole** | 0.56±0.05033 | 0.58±0.01155 | 102.4 |
| 58.14±2.3258 | 56.65±2.8450 | 97.4 |
| **Ilaprazole** | 0.67±0.01528 | 0.57±0.05657 | 85.5 |
| 61.21±3.5625 | 59.71±1.7601 | 97.5 |
| **Lansoprazole** | 0.59±0.0252 | 0.61±0.0839 | 103.4 |
| 63.65±2.1626 | 60.50±1.2360 | 95.1 |
| **Pantoprazole** | 0.63±0.0351 | 0.61±0.0586 | 97.9 |
| 63.89±2.9513 | 62.87±4.8036 | 98.4 |
| **Voronosine fumarate** | 0.75±0.06000 | 0.66±0.09165 | 88.0 |
| 78.28±1.7582 | 75.80±3.7643 | 96.8 |
